## 1 **A versatile high throughput strategy for cloning the env gene of HIV-1**

2 Nitesh Mishra<sup>1</sup>, Ayushman Dobhal<sup>1,2</sup>, Shaifali Sharma<sup>1,2</sup>, Kalpana Luthra<sup>1, #</sup>.

3 <sup>1</sup>Department of Biochemistry, All India Institute of Medical Sciences, New Delhi, India – 110029.

4 <sup>2</sup>These authors contributed equally.

5 #corresponding author ([kalpanaluthra@gmail.com](mailto:kalpanaluthra@gmail.com))

### 6 **Abstract**

7 The trimeric envelope glycoprotein (gp120/gp41)<sub>3</sub> of human immunodeficiency virus-1 (HIV-1)  
8 mediates viral and host cell membrane fusion, initiated by binding of viral envelope gp120 protein to  
9 the CD4 receptor on host immune cells. Functional env genes from infected individuals have been  
10 widely used as templates for vaccine design, for setting up viral neutralization assays and to study the  
11 viral evolution and pathogenesis. Traditional topoisomerase or T4 DNA polymerase mediated  
12 approaches for cloning single genome amplified (SGA) env genes are labor-intensive, cost-ineffective  
13 with low-throughput, thereby enabling functional analysis of only a limited number of env genes from  
14 the diverse circulating quasispecies in infected individuals. Herein, we report an efficient, easy to  
15 optimize and high-throughput approach for cloning diverse HIV-1 env genes. Multiple env/rev gene  
16 cassettes, derived from infected infants, were subjected to SGA using Phusion polymerase and  
17 utilized as megaprimers in overlap extension PCR mediated cloning (OEC), circumventing the  
18 requirement for novel enzymes. Furthermore, utilization of Phusion polymerase for both the  
19 amplification of env/rev cassettes and OEC allows convenient monitoring and optimization, thereby  
20 providing much greater flexibility and versatility for analysis of env genes from HIV-1 infected  
21 individuals.

### 22 **Introduction**

23 Rapid evolution of HIV-1 strains is increasing the global viral diversity. High baseline rates of mutation  
24 (nucleotide substitution rate) due to an error prone reverse transcriptase, rapid replication cycle, in  
25 combination with continuous immune-driven selection within the host generates a unique and  
26 complex viral quasispecies in each infected individual (1,2). In the context of HIV-1, the viral species  
27 in each infected individual accrues immunologically relevant mutations, generating a viral pool of  
28 highly complex and unique variants circulating within each host (3–5). Population based consensus  
29 viral sequences are used to define wildtype HIV-1 virus, but given the extensive diversity, each variant  
30 within a clade is distant from the consensus sequence, giving rise to millions of coexisting variants in  
31 circulation. Developing an HIV-1 vaccine is a global priority, and the discovery of broadly neutralizing  
32 antibodies (bnAbs) has invigorated the field of HIV-1 vaccine research (6,7). bnAbs target the  
33 envelope glycoprotein (env) of HIV-1 within defined epitopes, though inferred germlines (iGLs) of  
34 several bnAbs do not bind to most of the difficult-to-neutralize HIV-1 isolate. Identification and/or  
35 engineering of env variants capable of engaging and shepherding bnAb development pathway are a  
36 key focus of lineage-based vaccine approach (8–12).

37 Functional characterization of env gene provides key information for vaccine design, identify env  
38 candidates capable of serving as immunogens, understanding viral evolution and pathogenesis in  
39 response to host response, or mutational landscape among several other virological and  
40 immunological functions (3–5,8,13,14). Traditionally, envelopes are characterized by generating  
41 pseudoviruses (env genes from different hosts cloned in mammalian expression vectors) in  
42 combination with env deficient HIV-1 backbones (such as PSG3 $\Delta$ env, ZM247 $\Delta$ env) (15–18).  
43 Conventional approaches for amplifying env gene via single genome amplification (SGA) and cloning  
44 env gene are time and labor intensive processes. In addition, utilization of topoisomerases (TOPO  
45 cloning) or T4 DNA polymerases (SLIC, or Infusion cloning) to clone env gene can only be done at  
46 low throughput as increasing cost associated with cloning multiple env genes restricts the cloning to  
47 few select env clones (15,19,20). Single env clones are not representative of the diversity of HIV-1 in  
48 a patient's blood sample (19,21–25). The SGA technique using traditional TOPO or Infusion cloning  
49 kits to generate functional env clones that represent majority of the circulating quasispecies is low-  
50 throughput and not cost-effective due to the involvement of multiple PCR reactions, purification steps  
51 and ligation reactions.

52 In the age of high-throughput molecular and systems biology, several approaches have been  
53 described to overcome the limitations associated with conventional cloning approaches (26–41).  
54 Genes are often identified as difficult-to-clone that exhibit features such as uneven base distribution,  
55 secondary structures, toxicity to bacterial strain used for cloning and the HIV-1 env gene exhibits all  
56 of these features (42–44). Few select strategies exist by which the env gene can be cloned with high  
57 efficiency. One such approach called overlap extension cloning (OEC) involves solely a PCR-  
58 based cloning workflow that offers highest versatility in terms of optimizing cloning approaches (26–  
59 28). In OEC, the insert of interest (called a megaprimer) is used in conjunction with a proofreading  
60 polymerase that does not have strand displacement activity (such as Phusion polymerase) to swap  
61 the insert into vector backbone, and is sequence and ligation independent. Variants of OEC like IOEP  
62 (Improved Overlap Extension PCR) (29), IVA (In Vivo Assembly) (39), AQUA (Advanced QUick  
63 Assembly) (40), CPEC (Circular Polymerase Extension Cloning) (41) have initiated new avenues for  
64 high-throughput cloning. Most of these approaches work well for subcloning (swapping inserts from  
65 one plasmid backbone into another) but fail when applied to cloning gene of interest from biological  
66 samples. This study aimed to design a cost-effective and high-throughput approach to clone HIV-1  
67 env gene in order to capture maximum functional diversity of the circulating viral variants in infected  
68 individuals. A low-cost, easy to optimize, and high-throughput method, based on the principles of  
69 overlap extension cloning, to construct env clones representing the functional diversity of circulating  
70 HIV-1 viral variants is proposed herein, allowing rapid production of heterogenous patient derived env  
71 genes. The robustness of this strategy was further evaluated and confirmed by cloning viral env gene  
72 from eight HIV-1 infected infants.

## 73 **Results and Discussion**

74 Overlap extension cloning (**Fig. 1**) is a PCR-based cloning technique and therefore primer design is  
75 critical for a successful OEC, as non-specific primer binding can lead to amplification of spurious PCR

76 products. Conserved regions of the HIV-1 envelope were selected for primers design to clone the viral  
77 env gene, to accommodate for the high envelope sequence diversity, uneven base composition (on  
78 average 36% adenine, 22% thymine, 24% guanine and 18% cytosine) and high propensity of  
79 secondary structure in the AT-rich HIV-1 genome (42,43). Given that HIV-1 diverges overtime (1,2),  
80 we first updated our primer repository to ensure optimum amplification of the env gene (onwards  
81 called env/rev cassettes, as partial fragment for rev gene is part of the env gene). Two-step nested  
82 PCR reactions were used to amplify env/rev cassettes, where the forward primers (Fw1 and Fw2)  
83 bind to the tat region (upstream to the env gene), and the reverse primers (Rv1 and Rv2) bind to nef  
84 region (downstream to the env gene) (**Fig. 2a**). Our major goal was to design a cloning strategy  
85 where env/rev cassettes can be cloned in a single tube without the need for novel enzymes like  
86 topoisomerases, exonucleases, T4 DNA polymerases, Taq DNA ligase or recombinases. Therefore,  
87 the robustness of the nested PCR for env/rev amplification was of utmost importance. Using the  
88 parameters of Clade C tat and nef sequences of Indian origin available in Los Alamos National  
89 Laboratory's HIV Database, we selected a total of 276 tat (HXB2 numbering 5831 – 6045) and 140  
90 nef (HXB2 numbering 8797 – 9417) sequences. Sequences were aligned with HIValign tool using the  
91 HMM-align model with compensating mutation occurring within 5 codons to compensate frameshift  
92 and using previously reported primers (15–17) as anchors [VIF1 as Fw1 primer (HXB2 numbering  
93 5852 – 5876), ENVA as Fw2 primer (HXB2 numbering 5951 – 5980), OFM19 as Rv1 primer (HXB2  
94 numbering 9604 – 9632) and ENVN as Rv2 primer (HXB2 numbering 9144 – 9172)] (**Fig. 2a**). A total  
95 of 4 Fw1, 2 Rv1, 12 Fw2 and 6 Rv2 primers were selected (**Table 1**) to address the diversity observed  
96 within the geographically restricted sequences of Indian origin (**Fig. 2b – c**). We first utilized a  
97 multiplex PCR approach where all Fw1 and Rv1 primers were pooled for the first round, and all Fw2  
98 and Rv2 primers were pooled for the amplification via nested PCR. Though consistent amplification of  
99 env/rev cassettes across samples was achieved, the efficiency of PCR was low and in addition  
100 smearing and/or non-specific amplification were notably observed (**Fig. 2d**). To overcome this, we  
101 next performed nested PCR using all of the possible primer pair combinations (a total of 576  
102 individual PCR reactions), Four of these primer pairs yielded a prominent env/rev amplification from 8  
103 HIV-1 infected samples (**Fig. 2e**), randomly selected from a recent cohort of HIV-1 infected infants  
104 (45). Despite employing optimized primers selected from an exhaustive panel, the cloning efficiency  
105 of the env/rev cassettes via SGA amplification varied between samples. Further optimization of PCR  
106 for amplifying env/rev cassettes was done by varying the concentration of existing reactants  
107 (magnesium, DMSO, BSA, PEG8000, primers). In addition, reducing the number of cycles in the first  
108 round of nested PCR significantly reduced spurious, non-specific products observed in certain  
109 samples.

110 To generate overlaps (plasmid sequences at both ends) that can be used for OEC, we added  
111 overhangs of 15, 25 and 35 bp randomly selected, upstream of the multiple cloning site (MCS) region  
112 of pcDNA3.1, to the chimeric primers generated by combining four primers, with 5' end  
113 complementary to the vector and 3' ends optimum for amplification of env/rev cassettes. Interestingly,  
114 none of the chimeric primer pair combination could amplify env/rev cassettes from the eight patient  
115 samples but prominent amplification was seen when plasmids containing env/rev cassettes were

116 used. Weak amplification with 15 bp overhang chimeric primers were however observed in two of the  
117 eight samples (data not shown). HIV-1 contains an above average percentage of adenine (A)  
118 nucleotides, while cysteine (C) nucleotides are extremely low (**Supplementary Fig. 1**). Designing  
119 primers with standard primer designing rules to accommodate high HIV-1 diversity is therefore  
120 difficult. Primers used for amplification of env/rev cassettes are typically AT-rich while the overhang  
121 sequences taken from plasmids show typical pattern of base distribution (optimally dispersed  
122 pyrimidine and purine patterns). Addition of plasmid sequences to primers optimized for HIV-1 env/rev  
123 amplification, therefore, generates suboptimal chimeric primers (uneven distribution of pyrimidine and  
124 purine bases) plausibly explaining the failure of chimeric primers to amplify env/rev cassettes from  
125 biological samples. As amplification of env/rev cassettes with chimeric primers gave unsatisfactory  
126 results, we utilized an alternate approach for performing OEC with env/rev cassettes serving as  
127 megaprimers. We placed the Fw2 and Rv2 sequences 150 bp apart around the multiple cloning site  
128 (MCS) of pcDNA3.1 (pcDNA3.1\_ITR), generating a plasmid that can be directly used for OEC using  
129 env/rev cassettes amplified from patient samples (**Supplementary Fig. 2**).

130 OEC has been reported to use linear amplification, typically generating amplicons too little to be  
131 visualized on agarose gels. In addition, the effectiveness of OEC has been shown to be dependent  
132 upon megaprimer concentration, with the megaprimer concentration being inversely proportional to  
133 size (26). To obtain good yield, four parameters were sequentially optimized, namely the number of  
134 cycles, annealing temperatures, concentration of recipient plasmid (pcDNA3.1\_ITR), and  
135 concentration of megaprimer (env/rev cassette). We began our iterative optimization of OEC using 10  
136 to 100 ng of pcDNA3.1\_ITR and PCR purified env/rev cassettes at excess ratios of 1:3 to 1:300 in 25-  
137  $\mu$ l reactions using previously reported reaction conditions. The PCR reaction was inhibited at high  
138 DNA concentrations (100 ng of pcDNA3.1\_ITR and 1745 ng of PCR purified env/rev cassettes at 1:35  
139 molar excess ratios) (**Fig. 3a**). High concentrations of insert and lower annealing temperature for  
140 megaprimers have been implicated as necessary for successful OEC (26,27), however we found that  
141 a high concentration of the env gene insert often led to failed PCR. A molar excess ratio of 1:5 to 1:10  
142 of env/rev cassettes to 50 ng of pcDNA3.1\_ITR gave the most optimum results, though multiple  
143 bands after OEC were observed, when the vector to insert ratio exceeded 1:25 (**data not shown**).  
144 Higher annealing temperatures were required to maximize OEC efficiency (**Fig. 3b**), plausibly by  
145 minimizing the formation of interfering secondary structures, typical for lentiviruses (42,43), as hairpin  
146 structures within the template region can hinder the PCR amplification. Addition of BSA and removal  
147 of DMSO serendipitously eliminated the non-specific multiple bands observed with OEC. As DMSO  
148 disrupts secondary structure formation, the observed decrease in spurious PCR amplification in its  
149 absence is counterintuitive, and requires further exploration. In addition, the high concentration of  
150 pcDNA3.1\_ITR (10 ng) made DpnI digestion necessary in the OEC workflow, though DpnI could be  
151 added straight to Phusion HF buffer, thereby bypassing the need for purification steps. These reaction  
152 conditions were then taken forward for further optimization.

153 The number of cycles in OEC have been inversely linked to cloning efficiency and therefore to  
154 optimize the cycle number for amplification, we next performed OEC in increment of 2 cycles, with a

155 minimum amplification of 10 cycles to begin with. Considerable variation was observed for OEC  
156 efficiency as a measure of PCR cycles between samples (cfu/ng of DNA, figure), though 14 – 16  
157 cycles gave most satisfactory results (**Fig. 4a**). Few empty colonies were also observed in OEC done  
158 with pcDNA3.1\_ITR alone (serving as the vector control), presumably due to the carry-over of the  
159 vector, as DpnI digestion was performed directly in PCR buffer. Though commercially available  
160 restriction enzymes are active in PCR buffers, reaction efficiency varies between samples. To  
161 address the unwanted vector carryover, we subcloned CCDB gene (46) (from vector  
162 pZM247Fv1ΔEnv, procured from NIH AIDS Reagent Program) in-frame to T7 Promoter and between  
163 the Fw2 and Rv2 sites of pcDNA3.1\_ITR via OEC. Utilization of the suicide vector  
164 (pcDNA3.1\_ITR\_CCDB) containing CCDB gene for OEC of env/rev cassettes completely removed  
165 unwanted vector carry-over as well as the requirement for DpnI digestion.

166 Considering our initial goal was to develop a system that can be globally implemented across labs  
167 working with HIV-1, we reasoned using readily available pseudoviral env clones used across labs for  
168 standardized assessment of bnAbs or vaccine-induced sera nAbs as vectors for OEC. Herein, we first  
169 mutated the ENVA and ENVN sites in 329\_14\_B1 backbone (a subtype C pseudoviral clone,  
170 accession number MK076593) to our primer pairs (**refer to Table 1**), added a stop codon prior to V1  
171 region and used it as a vector for cloning env/rev cassettes amplified from patient samples via OEC.  
172 Addition of stop codon was necessary as it simplified the identification of functional clones for further  
173 downstream processing, given colony PCR was not possible as OEC was used to swap a 3.2 kb  
174 fragment with a similar sized env/rev cassette from biological samples. Interestingly, using this  
175 pcDNA3.1 delta env backbone gave significantly higher number of colonies compared to colonies  
176 observed with either pcDNA3.1\_ITR or pcDNA3.1\_ITR\_CCDB suicide vector (**Fig. 4b**), presumably  
177 due to increased regions of homology upstream to the ENVN and downstream to the ENVA ITR sites  
178 in 329\_14\_B1ΔEnv. To compare the efficiency of OEC, we then cloned the respective env/rev  
179 cassettes from the eight infant samples using the commercially available topoisomerase mediated  
180 (TOPO Cloning) and T4 DNA polymerase mediated (Infusion Cloning) cloning kits, and observed  
181 significantly higher cloning efficiency, indicating that OEC can be used to efficiently clone difficult-to-  
182 clone HIV-1 env gene (**Fig. 4c**)

183 Furthermore, we attempted to simplify and standardize the OEC protocol into a one-pot (single tube)  
184 approach for cloning env/rev cassettes. Using the unpurified PCR amplified env/rev cassettes from a  
185 sample that gave negligible non-specific background, we could successfully perform OEC as a one-  
186 pot platform for cloning env/rev cassettes, though a significantly high number of colonies containing  
187 the unwanted primer-dimers as insert were observed. Further titrating the initial concentration of  
188 primers used for env/rev amplification did decrease the number of unwanted primer-dimer colonies,  
189 but unwanted clones containing primer-dimers could not be completely eliminated. Utilizing  
190 touchdown PCR for amplification of env/rev cassettes minimized the number of spurious primer-dimer  
191 clones to almost negligible, though it also led to reduced number of colonies after successful OEC. Of  
192 particular note, one-pot approach only worked for env/rev cassettes amplified via SGA and not bulk  
193 PCR. Amplification of env/rev cassettes with touchdown PCR, followed by one-pot OEC reaction

194 using higher amount of vector, led to the most satisfactory results, though for better performance,  
195 PCR purification prior to OEC is necessary. Touchdown PCR (TD-PCR) was developed as a simpler  
196 solution to address the mispriming and production of non-specific (47), spurious products that often  
197 result due to poor melting temperature estimations and improper annealing conditions but in case of  
198 env/rev cassette amplification from biological samples, even the most optimized PCR conditions gave  
199 non-specific amplification in certain samples. PCRs for env/rev cassettes require optimization for each  
200 biological sample but given the extensive diversity and circulating mutant pool in an infected  
201 individual, optimized primers, on average, can minimize the requirement for PCR optimization from  
202 sample to sample.

203 Once we successfully swapped patient amplified env/rev cassettes into the HIV-25710\_2\_42  
204 backbone, another versatility of OEC became apparent. Given that swapping env/rev cassettes from  
205 one source into another could easily be achieved via OEC, we next utilized the same procedure to  
206 generate chimeras between different env/rev cassettes. Phusion polymerase has been reported to fail  
207 PCR amplification when complementary Fw and Rv primers (as suggested for QuikChange Kits) are  
208 used for site-directed mutagenesis (48). In our case, we observed persistent positive amplification  
209 when using Phusion to perform OEC for site-directed mutagenesis or chimeragenesis, though the  
210 primers had to be on average of 60-65 bp long to achieve more than 90% efficiency via OEC. For  
211 chimeragenesis, primers longer than 25 bp were required for efficiencies >90%. Though, of note, if  
212 DpnI digestion is optimum, OEC is an all or none approach, thereby, with reaction efficiencies  
213 approaching 100%. As noted for several other cloning approaches, and reported previously for OEC,  
214 cloning efficiency of OEC in the context of HIV-1 mutagenesis and chimeragenesis was a function of  
215 insert length, with considerably lower number of colonies observed for larger inserts (swaps for  
216 chimeras) compared to smaller inserts (**Fig. 5**).

217 Cloning of HIV-1 env/rev cassettes via OEC is easy to monitor and can be optimized for distinct  
218 biological samples with minimum modifications to the final protocol described in this study. For OEC,  
219 general rules for primer design apply, but additional focus is required for both the 5' - and 3' - ends  
220 with even distribution of pyrimidine and purine bases and either a G or C at the terminus. Under  
221 suboptimal conditions, OEC significantly generates unwanted clones, and therefore, optimization of  
222 reaction conditions is a necessity. Utilizing touchdown PCR further increases the efficiency of OEC for  
223 cloning env/rev cassettes as higher annealing temperatures compared with the expected primer T<sub>a</sub>  
224 during the initial PCR cycles results in increased PCR product specificity, as spurious primer-template  
225 interactions are less stable than the specific ones. Substantial non-specific amplification often  
226 necessitates PCR purification prior to OEC, and utilization of TD-PCR further simplifies the OEC  
227 workflow. To validate the optimized OEC strategy, HIV-1 env/rev cassettes were amplified from 8  
228 infected infants, of which only, a single sample required modified protocols (varied T<sub>a</sub>) for successful  
229 OEC. The flexibility and high-throughput of OEC allows far greater versatility than the current global  
230 standard of TOPO mediated cloning for characterizing HIV-1 envelope glycoprotein. SGA amplified  
231 env/rev cassettes could be integrated into the vector by a single PCR, bypassing the need for utilizing  
232 expensive cloning kits, or novel enzymes such as T4 DNA polymerase, Taq DNA ligase,



233 exonucleases and recombinases. The requirement to continuously monitor and optimize OEC is in  
234 parallel to any long PCR protocol, and requires moderate level of experience and understanding on  
235 the user's part. To summarize, herein, we report OEC as an alternate PCR-based approach for  
236 cloning HIV-1 env/rev cassettes, that can yield high-efficiency amplification of HIV-1 envelopes with  
237 diverse sequence variability.

## 238 **Materials and Methods**

### 239 **Materials**

240 Phusion DNA polymerase, dNTPs, DpnI, DMSO and BSA were purchased from Thermo Scientific. *E.*  
241 *coli* TOP10 (Invitrogen) was used for cloning and competent cells were prepared in-house ( $10^6 - 10^7$   
242 cfu/ $\mu$ g). DNA oligonucleotides were synthesized by Eurofins genomics, India. The pcDNA3.1 (+)  
243 vector was procured from Invitrogen. The pZM247Fv1 $\Delta$ Env was acquired from NIH AIDS Reagent  
244 Program (#11940). The lab generated pseudovirus 329\_14\_B1 is described previously(18).

### 245 **Designing modified primers for env/rev amplification using HIV-1 Alignments**

246 The Indian Clade C tat and nef sequences were compiled from the Los Alamos National Laboratory  
247 HIV-1 Sequence Database using the sequence search interface  
248 (<https://www.hiv.lanl.gov/components/sequence/HIV/search/search.html>), and codon-aligned using  
249 the HIV align (<https://www.hiv.lanl.gov/content/sequence/VIRALIGN/viralalign.html>) tool using the HMM-  
250 align model with compensating mutation occurring within 5 codons to compensate for frameshift. The  
251 MEGA-X and ClustalX2 software tools were used for manually editing the alignments. Schematic  
252 plots to represent the sequence diversity, a measure of mismatches in the alignments, were  
253 generated using the highlighter tool  
254 ([https://www.hiv.lanl.gov/content/sequence/HIGHLIGHT/highlighter\\_top.html](https://www.hiv.lanl.gov/content/sequence/HIGHLIGHT/highlighter_top.html)) with sequences sorted  
255 by similarity and gaps in the alignment treated as characters. Previously described primers were used  
256 as anchors to design optimized primers for Indian Clade C sequences. Overlaps comprising of 15, 25,  
257 and 35 base pairs [5' to the BamHI site, and 3' to the Apal site in pcDNA3.1(+)] with the primer pairs  
258 were manually incorporated using the SnapGene Viewer Program. Primers for site-directed  
259 mutagenesis of the pseudovirus 329\_14\_B1 were designed using Agilent's quikchange primer  
260 designing tool. Primers for chimeragenesis were manually designed based on swapping inserts of  
261 varying length into the 329\_14\_B1 HIV-1 pseudoviral clone utilizing SnapGene Viewer Program, with  
262 normal primer designing rules of 20-25 bp length with a Tm of approximately 60°C, ideally ending with  
263 G/C with last 6 bp containing equal number of pyrimidine and purine bases.

### 264 **Vector design and construction**

265 pcDNA3.1\_ITR, pcDNA3.1\_ITR\_CCDB and pcDNA3.1delta Env were engineered using the  
266 mammalian expression vector pcDNA3.1 (+) through a series of overlap extension cloning reactions.  
267 pcDNA3.1\_ITR was generated via cloning ITR sites ENVA (5' -  
268 CACCGGCTTAGGAATTTACTATGGCAGGAAG - 3') and ENVN (5' -  
269 TGCCAATCAGGGAAAAGCCTTGTGTG - 3') upstream to BamHI and downstream to Apal

270 restriction site respectively. Vector pcDNA3.1\_ITR\_CCDB, CCDB gene was PCR amplified from  
271 vector ZM247Fv1ΔEnv using primers ENVA\_CCDB\_Forward (5' -  
272 TAGGAATTTACTATGGCAGGAAGATGCAGTTTAAGGTTTACACC - 3') and ENVN\_CCDB\_Reverse  
273 (5' - GCCAATCAGGGAAAAAGCCTTGTGTGTTATATTTCCCCAGAACATCAGGTTAATGG - 3'). The  
274 amplicon was next swapped using OEC into 10 ng of vector pcDNA3.1\_ITR using CCDB gene as  
275 megaprimer at a ratio of 1:350. The PCR conditions used were an initial denaturation at 98°C for 2  
276 min followed by 16 cycles of denaturation at 98°C for 10 sec, annealing at 64°C for 30 sec, and  
277 extension at 72°C for 3 min and a final extension at 72°C for 5 min. The pcDNA3.1ΔEnv (in  
278 pseudoviral backbone 329\_14\_B1) was generated by inserting a stop codon prior to V1 region of the  
279 env gene using primers V1\_Stop\_Forward (5' -  
280 CAGATGCAGGAGGATGTAATCAGTTTAATGGGATCAAAGCCTAAAGCCATGTG - 3') and  
281 V1\_Stop\_Reverse (5' -  
282 CACATGGCTTTAGGCTTTGATCCCATTAAGTACTGATTACATCCTCCTGCATCTG - 3'). All  
283 transformation reactions were performed using in-house prepared TOP10 competent cells followed by  
284 sequencing to confirm successful generation of vectors.

### 285 **Amplification of env/rev cassettes and overlap extension cloning (OEC) PCR**

286 The env/rev cassettes of HIV-1 from infected infants were amplified as described previously. Briefly,  
287 viral RNA was isolated from 140 µl of plasma using QIAamp Viral RNA Mini Kit, reverse transcribed,  
288 using gene specific primer OFM19 (5' - GCACTCAAGGCAAGCTTTATTGAGGCTTA - 3') and  
289 Superscript IV reverse transcriptase into cDNA. The cDNA was then used as template to amplify the  
290 envelope gene using High Fidelity Phusion DNA Polymerase (New England Biolabs). Nested PCRs  
291 were performed, using primers given in table 1 with the following PCR conditions; an initial  
292 denaturation at 98°C for 2 min, followed by 25 cycles of denaturation at 98°C for 10 sec, annealing at  
293 59°C for 30 sec, and extension at 72°C for 2 min and a final extension at 72°C for 5 min. A second  
294 round PCR was performed using first round amplicons with reaction conditions of initial denaturation  
295 of 98°C for 2 min, followed by 35 cycles of denaturation at 98°C, annealing at 59°C for 30 sec, and  
296 extension at 72°C for 90 sec, and a final extension at 72°C for 90 sec. The env/rev cassettes were  
297 PCR purified using the QIAquick PCR & Gel Cleanup Kit and utilized as megaprimers for overlap  
298 extension cloning into pcDNA3.1 vector backbone (pcDNA3.1\_ITR, pcDNA3.1\_ITR\_CCDB, and  
299 pcDNA3.1ΔEnv). Overlap extension cloning was performed with varying amount of pcDNA vector  
300 backbone and env/rev cassettes with PCR reaction conditions of initial denaturation at 98°C for 2 min,  
301 followed by 10 – 24 cycles of denaturation at 98°C for 10 sec, annealing at 62°C for 30 sec, and  
302 extension at 72°C for 4.5 min, and a final extension of 5 min at 72°C. In addition, 1% DMSO and 1%  
303 BSA (1 mg/ml) were used as additives for OEC of env/rev cassettes. The PCR products were  
304 analyzed using 0.8% Agarose gel electrophoresis.

### 305 **Transformation and DNA Sequencing**

306 Aliquots (5 µl) of undigested and DpnI digested OEC PCR amplicons were directly transformed into  
307 in-house generated chemically competent TOP10 cells. Cells were spread on 2XYT-agar plates



308 containing 100 µg/ml of ampicillin sodium salt and incubated overnight at 30°C. For env/rev cassettes,  
309 incubation at lower temperature reduced the toxicity associated with problematic DNA sequences  
310 (42–44). The number of colonies grown on each plate were calculated and normalized to per ng of  
311 starting vector backbone to calculate cloning efficiency (colony forming units per ng of DNA). DNA  
312 Sequencing was performed commercially from eurofins genomics, India.

### 313 **Acknowledgments**

314 We are thankful to all the study subjects for participating in this study and the NIH AIDS Reagent  
315 program for providing HIV-1 envelope pseudovirus plasmids.

### 316 **Funding**

317 This work was funded by Department of Biotechnology, India (BT/PR5066/MED/1582/2012 and  
318 BT/PR30120/MED/29/1339/2018) and Science and Engineering Research Board, Department of  
319 Science and Technology, India (EMR/2015/001276). The Junior Research Fellowship (January 2016  
320 – December 2018) and Senior Research Fellowship (January 2019 – October 2019) to N.M was  
321 supported by University Grants Commission (UGC), India.

### 322 **Author Contributions**

323 N.M, S.S and K.L designed the study. N.M, A.D and S.S performed the experimental work. N.M  
324 analyzed the data, wrote the initial manuscript, revised and finalized the manuscript. K.L wrote,  
325 edited, revised and finalized the manuscript.

### 326 **Competing Interests**

327 The authors declare no competing financial interests.

### 328 **Data and Material Availability**

329 All data required to state the conclusions in the paper are present in the paper and/or the  
330 supplementary data. Additional information related to the paper, if required, can be requested from  
331 the authors.

### 332 **References**

- 333 1. Korber B, Hraber P, Wagh K, Hahn BH. Polyvalent vaccine approaches to combat HIV-1  
334 diversity. *Immunol Rev.* 2017;275(1):230–44.
- 335 2. Ackerman ME, Barouch DH, Alter G. Systems serology for evaluation of HIV vaccine trials.  
336 *Immunol Rev.* 2017;275(1):262–70.
- 337 3. Bhiman JN, Anthony C, Doria-Rose NA, Karimanzira O, Schramm CA, Khoza T, et al. Viral  
338 variants that initiate and drive maturation of V1V2-directed HIV-1 broadly neutralizing  
339 antibodies. *Nat Med.* 2015 Nov;21(11):1332–6.
- 340 4. Wibmer CK, Bhiman JN, Gray ES, Tumba N, Abdool Karim SS, Williamson C, et al. Viral  
341 escape from HIV-1 neutralizing antibodies drives increased plasma neutralization breadth  
342 through sequential recognition of multiple epitopes and immunotypes. *PLoS Pathog.* 2013  
343 Oct;9(10):e1003738.

- 344 5. Doria-Rose NA, Schramm CA, Gorman J, Moore PL, Bhiman JN, DeKosky BJ, et al.  
345 Developmental pathway for potent V1V2-directed HIV-neutralizing antibodies. *Nature*. 2014 May  
346 1;509(7498):55–62.
- 347 6. Kwong PD, Mascola JR. HIV-1 Vaccines Based on Antibody Identification, B Cell Ontogeny, and  
348 Epitope Structure. *Immunity*. 2018 15;48(5):855–71.
- 349 7. Sok D, Burton DR. Recent progress in broadly neutralizing antibodies to HIV. *Nat Immunol*.  
350 2018 Nov;19(11):1179–88.
- 351 8. Sanders RW, Derking R, Cupo A, Julien J-P, Yasmeen A, de Val N, et al. A next-generation  
352 cleaved, soluble HIV-1 Env trimer, BG505 SOSIP.664 gp140, expresses multiple epitopes for  
353 broadly neutralizing but not non-neutralizing antibodies. *PLoS Pathog*. 2013 Sep;9(9):e1003618.
- 354 9. Sanders RW, van Gils MJ, Derking R, Sok D, Ketas TJ, Burger JA, et al. HIV-1 VACCINES.  
355 HIV-1 neutralizing antibodies induced by native-like envelope trimers. *Science*. 2015 Jul  
356 10;349(6244):aac4223.
- 357 10. Pugach P, Ozorowski G, Cupo A, Ringe R, Yasmeen A, de Val N, et al. A native-like SOSIP.664  
358 trimer based on an HIV-1 subtype B env gene. *J Virol*. 2015 Mar;89(6):3380–95.
- 359 11. Klasse PJ, Ketas TJ, Cottrell CA, Ozorowski G, Debnath G, Camara D, et al. Epitopes for  
360 neutralizing antibodies induced by HIV-1 envelope glycoprotein BG505 SOSIP trimers in rabbits  
361 and macaques. *PLoS Pathog*. 2018;14(2):e1006913.
- 362 12. Slieden K, Han BW, Bontjer I, Mooij P, Garces F, Behrens A-J, et al. Structure and  
363 immunogenicity of a stabilized HIV-1 envelope trimer based on a group-M consensus sequence.  
364 *Nat Commun*. 2019 29;10(1):2355.
- 365 13. Dingens AS, Arenz D, Weight H, Overbaugh J, Bloom JD. An Antigenic Atlas of HIV-1 Escape  
366 from Broadly Neutralizing Antibodies Distinguishes Functional and Structural Epitopes.  
367 *Immunity*. 2019 19;50(2):520-532.e3.
- 368 14. Song H, Hora B, Giorgi EE, Kumar A, Cai F, Bhattacharya T, et al. Transmission of Multiple  
369 HIV-1 Subtype C Transmitted/founder Viruses into the Same Recipients Was not Determined by  
370 Modest Phenotypic Differences. *Sci Rep*. 2016 02;6:38130.
- 371 15. Li M, Gao F, Mascola JR, Stamatatos L, Polonis VR, Koutsoukos M, et al. Human  
372 immunodeficiency virus type 1 env clones from acute and early subtype B infections for  
373 standardized assessments of vaccine-elicited neutralizing antibodies. *J Virol*. 2005  
374 Aug;79(16):10108–25.
- 375 16. Li M, Salazar-Gonzalez JF, Derdeyn CA, Morris L, Williamson C, Robinson JE, et al. Genetic  
376 and neutralization properties of subtype C human immunodeficiency virus type 1 molecular env  
377 clones from acute and early heterosexually acquired infections in Southern Africa. *J Virol*. 2006  
378 Dec;80(23):11776–90.
- 379 17. Kulkarni SS, Lapedes A, Tang H, Gnanakaran S, Daniels MG, Zhang M, et al. Highly complex  
380 neutralization determinants on a monophyletic lineage of newly transmitted subtype C HIV-1  
381 Env clones from India. *Virology*. 2009 Mar 15;385(2):505–20.
- 382 18. Mishra N, Makhdooni MA, Sharma S, Kumar S, Dobhal A, Kumar D, et al. Viral Characteristics  
383 Associated with Maintenance of Elite Neutralizing Activity in Chronically HIV-1 Clade C-Infected  
384 Monozygotic Pediatric Twins. *J Virol*. 2019 Sep 1;93(17).
- 385 19. Keele BF, Giorgi EE, Salazar-Gonzalez JF, Decker JM, Pham KT, Salazar MG, et al.  
386 Identification and characterization of transmitted and early founder virus envelopes in primary  
387 HIV-1 infection. *Proc Natl Acad Sci USA*. 2008 May 27;105(21):7552–7.

- 388 20. Kouyos RD, Rusert P, Kadelka C, Huber M, Marzel A, Ebner H, et al. Tracing HIV-1 strains that  
389 imprint broadly neutralizing antibody responses. *Nature*. 2018 Sep;561(7723):406–10.
- 390 21. MacLeod DT, Choi NM, Briney B, Garces F, Ver LS, Landais E, et al. Early Antibody Lineage  
391 Diversification and Independent Limb Maturation Lead to Broad HIV-1 Neutralization Targeting  
392 the Env High-Mannose Patch. *Immunity*. 2016 17;44(5):1215–26.
- 393 22. Bar KJ, Li H, Chamberland A, Tremblay C, Routy JP, Grayson T, et al. Wide variation in the  
394 multiplicity of HIV-1 infection among injection drug users. *J Virol*. 2010 Jun;84(12):6241–7.
- 395 23. Mabvakure BM, Scheepers C, Garrett N, Abdool Karim S, Williamson C, Morris L, et al. Positive  
396 Selection at Key Residues in the HIV Envelope Distinguishes Broad and Strain-Specific Plasma  
397 Neutralizing Antibodies. *J Virol*. 2019 15;93(6).
- 398 24. Kijak GH, Sanders-Buell E, Chenine A-L, Eller MA, Goonetilleke N, Thomas R, et al. Rare HIV-1  
399 transmitted/founder lineages identified by deep viral sequencing contribute to rapid shifts in  
400 dominant quasispecies during acute and early infection. *PLoS Pathog*. 2017  
401 Jul;13(7):e1006510.
- 402 25. Kijak GH, Sanders-Buell E, Pham P, Harbolick EA, Oropeza C, O'Sullivan AM, et al. Next-  
403 generation sequencing of HIV-1 single genome amplicons. *Biomol Detect Quantif*. 2019  
404 Mar;17:100080.
- 405 26. Bryksin AV, Matsumura I. Overlap extension PCR cloning: a simple and reliable way to create  
406 recombinant plasmids. *BioTechniques*. 2010 Jun;48(6):463–5.
- 407 27. Bryksin A, Matsumura I. Overlap extension PCR cloning. *Methods Mol Biol*. 2013;1073:31–42.
- 408 28. Zhang H, Liu C-J, Jiang H, Zhou L, Li W-Y, Zhu L-Y, et al. Mega primer-mediated molecular  
409 cloning strategy for chimaeragenesis and long DNA fragment insertion. *Biosci Rep*. 2017  
410 30;37(2).
- 411 29. Guo W, Xie B, Jiang M, Zhu X-J, Qiu M, Dai Z-M. An improved overlap extension PCR for  
412 simultaneous multiple sites large fragments insertion, deletion and substitution. *Sci Rep*. 2019  
413 Oct 30;9(1):15637.
- 414 30. Huang J, Yu Z, Li M-H, Li N, Zhou J, Zheng Y-G. A strategy for seamless cloning of large DNA  
415 fragments from *Streptomyces*. *BioTechniques*. 2015 Oct;59(4):193–4, 196, 198–200.
- 416 31. Liu C-J, Jiang H, Wu L, Zhu L-Y, Meng E, Zhang D-Y. OEPR Cloning: an Efficient and  
417 Seamless Cloning Strategy for Large- and Multi-Fragments. *Sci Rep*. 2017 16;7:44648.
- 418 32. Motohashi K. Seamless Ligation Cloning Extract (SLICE) Method Using Cell Lysates from  
419 Laboratory *Escherichia coli* Strains and its Application to SLiP Site-Directed Mutagenesis.  
420 *Methods Mol Biol*. 2017;1498:349–57.
- 421 33. Zhong C, You C, Wei P, Zhang Y-HP. Simple Cloning by Prolonged Overlap Extension-PCR  
422 with Application to the Preparation of Large-Size Random Gene Mutagenesis Library in  
423 *Escherichia coli*. *Methods Mol Biol*. 2017;1472:49–61.
- 424 34. Chaudhary VK, Shrivastava N, Verma V, Das S, Kaur C, Grover P, et al. Rapid restriction  
425 enzyme-free cloning of PCR products: a high-throughput method applicable for library  
426 construction. *PLoS ONE*. 2014;9(10):e111538.
- 427 35. Li C, Wen A, Shen B, Lu J, Huang Y, Chang Y. FastCloning: a highly simplified, purification-free,  
428 sequence- and ligation-independent PCR cloning method. *BMC Biotechnol*. 2011 Oct 12;11:92.
- 429 36. Li MZ, Elledge SJ. Harnessing homologous recombination in vitro to generate recombinant DNA  
430 via SLIC. *Nat Methods*. 2007 Mar;4(3):251–6.

- 431 37. Zhou MY, Gomez-Sanchez CE. Universal TA cloning. *Curr Issues Mol Biol.* 2000 Jan;2(1):1–7.
- 432 38. Zhang Y, Werling U, Edelman W. SLiCE: a novel bacterial cell extract-based DNA cloning  
433 method. *Nucleic Acids Res.* 2012 Apr;40(8):e55.
- 434 39. García-Nafría J, Watson JF, Greger IH. IVA cloning: A single-tube universal cloning system  
435 exploiting bacterial In Vivo Assembly. *Sci Rep.* 2016 06;6:27459.
- 436 40. Beyer HM, Gonschorek P, Samodelov SL, Meier M, Weber W, Zurbriggen MD. AQUA Cloning:  
437 A Versatile and Simple Enzyme-Free Cloning Approach. *PLoS ONE.* 2015;10(9):e0137652.
- 438 41. Quan J, Tian J. Circular polymerase extension cloning. *Methods Mol Biol.* 2014;1116:103–17.
- 439 42. van der Kuyl AC, Berkhout B. The biased nucleotide composition of the HIV genome: a constant  
440 factor in a highly variable virus. *Retrovirology.* 2012 Nov 6;9:92.
- 441 43. van Hemert F, van der Kuyl AC, Berkhout B. On the nucleotide composition and structure of  
442 retroviral RNA genomes. *Virus Res.* 2014 Nov 26;193:16–23.
- 443 44. Benureau Y, Colin P, Staropoli I, Gonzalez N, Garcia-Perez J, Alcamí J, et al. Guidelines for  
444 cloning, expression, purification and functional characterization of primary HIV-1 envelope  
445 glycoproteins. *J Virol Methods.* 2016;236:184–95.
- 446 45. Mishra N, Sharma S, Dobhal A, Kumar S, Chawla H, Singh R, et al. Broadly neutralizing plasma  
447 antibodies effective against diverse autologous circulating viruses in infants with multivariant  
448 HIV-1 infection. *bioRxiv.* 2020 Feb 3;837039.
- 449 46. Tripathi A, Swaroop S, Varadarajan R. Molecular Determinants of Temperature-Sensitive  
450 Phenotypes. *Biochemistry.* 2019 02;58(13):1738–50.
- 451 47. Korbie DJ, Mattick JS. Touchdown PCR for increased specificity and sensitivity in PCR  
452 amplification. *Nat Protoc.* 2008;3(9):1452–6.
- 453 48. Xia Y, Chu W, Qi Q, Xun L. New insights into the QuikChange™ process guide the use of  
454 Phusion DNA polymerase for site-directed mutagenesis. *Nucleic Acids Res.* 2015  
455 Jan;43(2):e12.
- 456
- 457

458 **Figures and Tables**

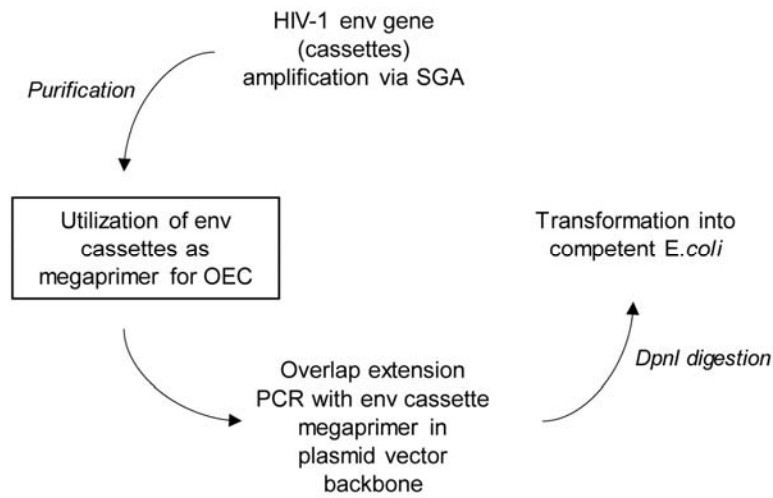

459

460 **Figure 1 – Schematic flow for overlap extension cloning.** Outline of the major steps involved in  
461 OEC is provided. The key step outlining the utilization of env/rev cassettes as megaprimer is boxed.  
462 First, env/rev cassettes are PCR amplified from HIV-1 infected individuals and then used as  
463 megaprimers in plasmid vectors containing the integration sites (sequence of forward and reverse  
464 primer for env/rev cassette amplification) (see the vector map provided in supplementary figure 2),  
465 ultimately leading to generation of double nicked plasmid which is transformed into *E.coli*.

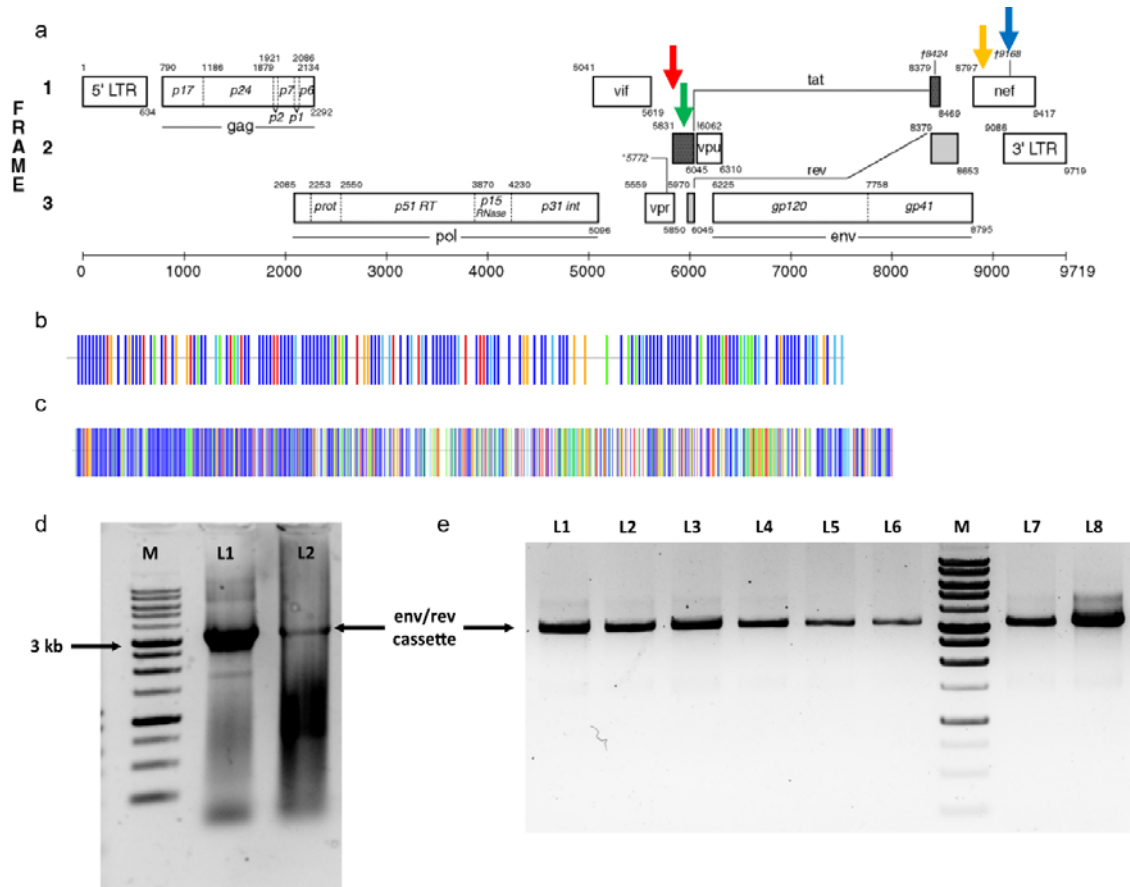

466

467 **Figure 2 – Optimizing the amplification of env/rev cassettes.** (a) Schematic map of the HIV-1  
 468 genome showing the position of nested PCR primers. Within the first exon of *tat*, 1st round forward  
 469 primer (Fw1) is marked by red, 2nd round forward primer (Fw2) is marked by green, and within the *nef*  
 470 region 1st round reverse primer (Rv1) is marked by blue and 2nd round reverse primer (Rv2) is  
 471 marked by yellow arrow. (b – c) Schematic map of the *tat* and *nef* region representing the sequence  
 472 diversity in Indian clade C sequences reported in LANL HIV-1 database. Dark blue lines represent  
 473 position that contain any of the four bases, while green lines represent adenine, red line represent  
 474 thymine, orange line represent guanine and sky-blue lines represent cytosine relative to the Indian  
 475 clade C consensus sequence generated by aligning available sequence from HIV-1 database. (d – e)  
 476 Gel pictures showing amplified env/rev cassettes (~3.2 kb) from updated primer pairs as mentioned in  
 477 table 1. In d, L1 represent plasmid control (HIV-25710, NIH AIDS Reagent Program #11505) while L2  
 478 represents amplified env/rev cassette using multiplex approach while in e, L1 to L8 represent env/rev  
 479 amplification after optimization of primer binding using iterative selection approach.



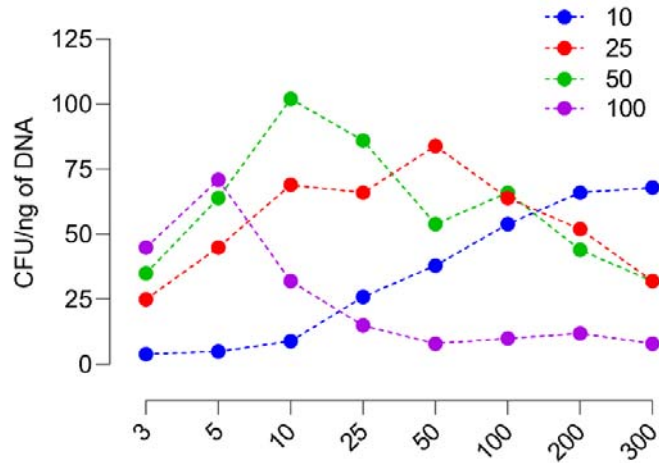

480

481 **Figure 3 – High concentration of megaprimer inhibits OEC.** Overlap extension cloning of env/rev  
482 cassette from a single infant was cloned in pcDNA3.1\_ITR at increasing ratios of vector to insert (1:3  
483 to 1:300) as well as increasing amount of starting vector (10 to 100 ng of pcDNA3.1\_ITR). Colony  
484 forming unit (CFU) were counted as the number of colonies normalized to starting vector amount. A  
485 vector to insert ratio of 1: 10 to 1:20 with starting vector amount of 10 ng showed maximum cloning  
486 efficiency across samples.

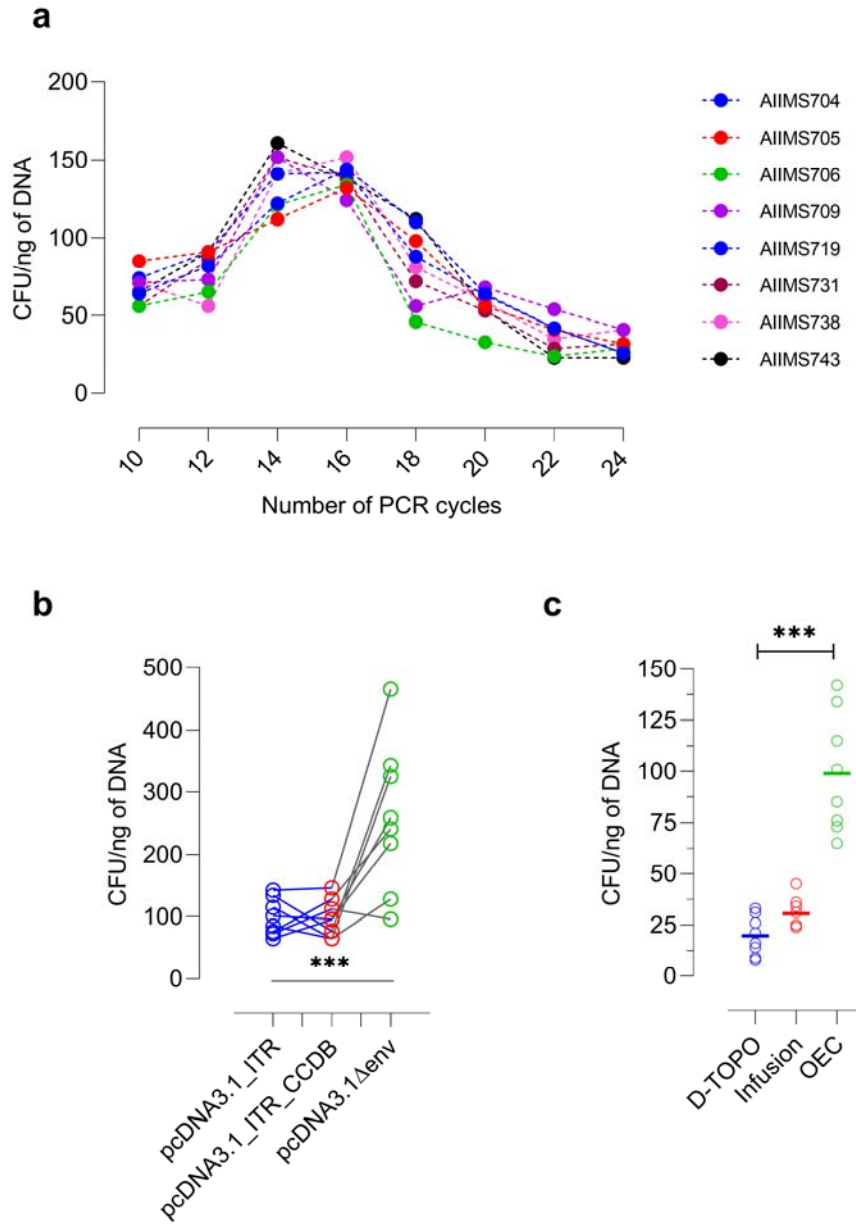

487

488 **Figure 4 – OEC efficiency as a function of amplification cycle.** Overlap extension cloning  
 489 performed for env/rev cassettes amplified from eight infant plasma samples was iteratively optimized  
 490 as a function of amplification cycles in OEC PCR. 14 – 16 cycles consistent gave satisfactory cloning  
 491 efficiency across samples. Colony forming unit (CFU) were counted as the number of colonies  
 492 normalized to starting vector amount. (b) Diverse vector backbones were utilized to further improve  
 493 the OEC cloning efficiency. Using pcDNA3.1Δenv vector backbone, maximum efficiency of OEC was  
 494 achieved. (c) Comparison of the cloning efficiency of the topoisomerase mediated (D-TOPO), T4 DNA  
 495 polymerase mediated (Infusion) and overlap extension PCR mediated (OEC) cloning strategies for  
 496 cloning the env/rev cassettes from eight HIV-1 infected infants.

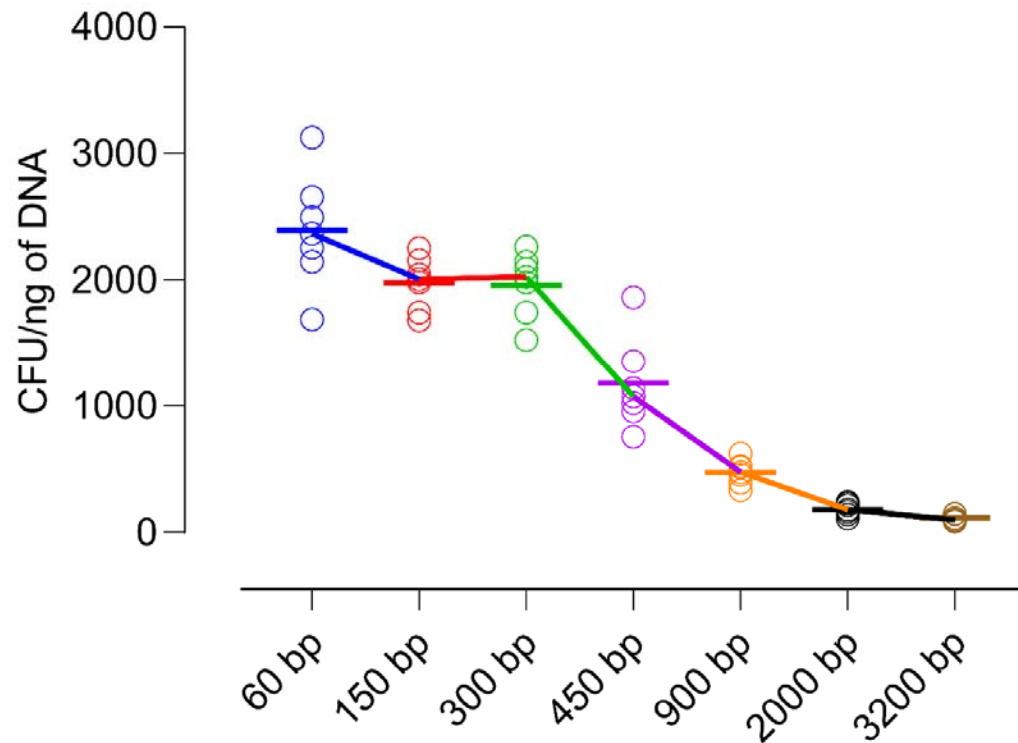

497  
498

**Figure 5 – Efficiency of Overlap Extension Cloning for chimeragenesis in env/rev cassettes.**

499 With varying length of megaprimers (inserts to be swapped), Overlap extension cloning was  
500 performed for chimeragenesis. Results are reported for six independent experiments. Colony forming  
501 unit (CFU) were counted as the number of colonies normalized to starting vector amount. All the  
502 megaprimers were swapped into the vector backbone pcDNA3.1-329\_14\_B1. Marked reduction in  
503 cloning efficiency (chimeragenesis) with increasing length of insert was observed though satisfactory  
504 results were still observed.

| Nested PCR Round | Primer ID   | Sequence (5' - 3')            | HXB2 Position |
|------------------|-------------|-------------------------------|---------------|
| 1st Round        | Fw1.1_VIF1  | TAGAGCCCTGGAATCATCCAGGAAG     | 5852 – 5876   |
| 1st Round        | Fw1.2_VIF1  | TAGAGCCCTGGAATCATCCAGGCAG     | 5852 – 5876   |
| 1st Round        | Fw1.3_VIF1  | TAGAGCCCTGGAACCATCCAGGAAG     | 5852 – 5876   |
| 1st Round        | Fw1.4_VIF1  | TAGAGCCCTGGAACCATCCAGGCAG     | 5852 – 5876   |
| 1st Round        | Rv1.1_OFM19 | GCACTCAAGGCAAGCTTTATTGAGGCTTA | 9604 – 9632   |
| 1st Round        | Rv1.2_OFM19 | GCACTCAAGGCAAGCCTTATTGAGGCTTA | 9604 – 9632   |
| 2nd Round        | Fw2.1_ENVA  | GGCTTAGGCATTTACTATGGCAGGAAG   | 5951 – 5980   |
| 2nd Round        | Fw2.2_ENVA  | GGCTTAGGAATTCCTATGGCAGGAAG    | 5951 – 5980   |
| 2nd Round        | Fw2.3_ENVA  | GGCTTAGGTATTTACTATGGCAGGAAG   | 5951 – 5980   |
| 2nd Round        | Fw2.4_ENVA  | GGCTTAGGCATTCCTATGGCAGGAAG    | 5951 – 5980   |

|           |             |                             |             |
|-----------|-------------|-----------------------------|-------------|
| 2nd Round | Fw2.5_ENVA  | GGCTTAGGAATTTACTATGGCAGGAAG | 5951 – 5980 |
| 2nd Round | Fw2.6_ENVA  | GGCTTAGGTATTTCTATGGCAGGAAG  | 5951 – 5980 |
| 2nd Round | Fw2.7_ENVA  | GGCTTAAGCATTACTATGGCAGGAAG  | 5951 – 5980 |
| 2nd Round | Fw2.8_ENVA  | GGCTTAAGAATTTCTATGGCAGGAAG  | 5951 – 5980 |
| 2nd Round | Fw2.9_ENVA  | GGCTTAAGTATTTACTATGGCAGGAAG | 5951 – 5980 |
| 2nd Round | Fw2.10_ENVA | GGCTTAAGCATTTCCTATGGCAGGAAG | 5951 – 5980 |
| 2nd Round | Fw2.11_ENVA | GGCTTAAGAATTTACTATGGCAGGAAG | 5951 – 5980 |
| 2nd Round | Fw2.12_ENVA | GGCTTAAGTATTTCTATGGCAGGAAG  | 5951 – 5980 |
| 2nd Round | Rv2.1_ENVN  | TGCCAATCAGGGAAAAAGCCTTGTGTG | 9144 – 9172 |
| 2nd Round | Rv2.2_ENVN  | TGCCAATCAGGGAAATAGCCTTGTGTG | 9144 – 9172 |
| 2nd Round | Rv2.3_ENVN  | TGCCAATCAGGGAAACAGCCTTGTGTG | 9144 – 9172 |
| 2nd Round | Rv2.4_ENVN  | TGCCAATCAGGGAAGAAGCCTTGTGTG | 9144 – 9172 |
| 2nd Round | Rv2.5_ENVN  | TGCCAATCAGGGAAGTAGCCTTGTGTG | 9144 – 9172 |
| 2nd Round | Rv2.6_ENVN  | TGCCAATCAGGGAAGCAGCCTTGTGTG | 9144 – 9172 |

505 Table 1 – Primer pairs used for the amplification of HIV-1 Indian clade C env/rev cassettes. Primer  
 506 pair Fw1.3\_VIF1/Rv1.1\_OFM19 for 1<sup>st</sup> round PCR and Fw2.6\_ENVA/Rv2.4\_ENVN for 2<sup>nd</sup> round gave  
 507 most satisfactory env/rev cassette amplification across samples.

#### 508 **Supplementary Figures**

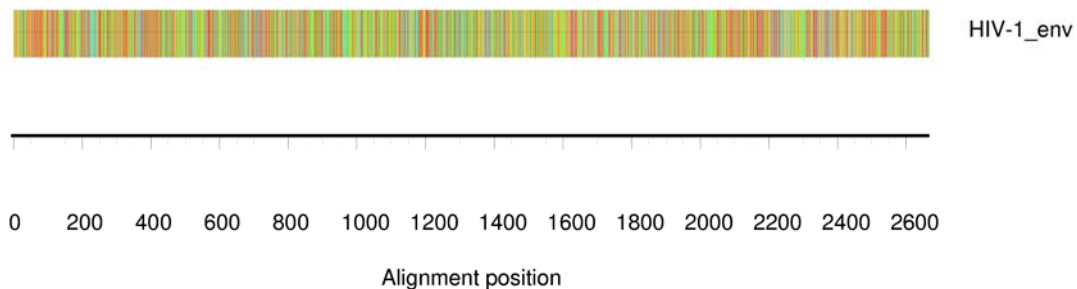

509

510 **Supplementary Figure 1 – Unusual base composition of HIV-1 env gene.** HIV-1 contains an  
 511 above average percentage of adenine (A) nucleotides, while cysteine (C) nucleotides are extremely  
 512 low as evident by the large percentage of red (adenine), and limited percentage of blue (cytosine)  
 513 lines in the base composition plot for consensus env sequence (HIV-1\_env) generated by aligning the  
 514 env sequences of Indian clade C available in LANL HIV-1 database  
 515 <https://www.hiv.lanl.gov/components/sequence/HIV/search/search.html>).

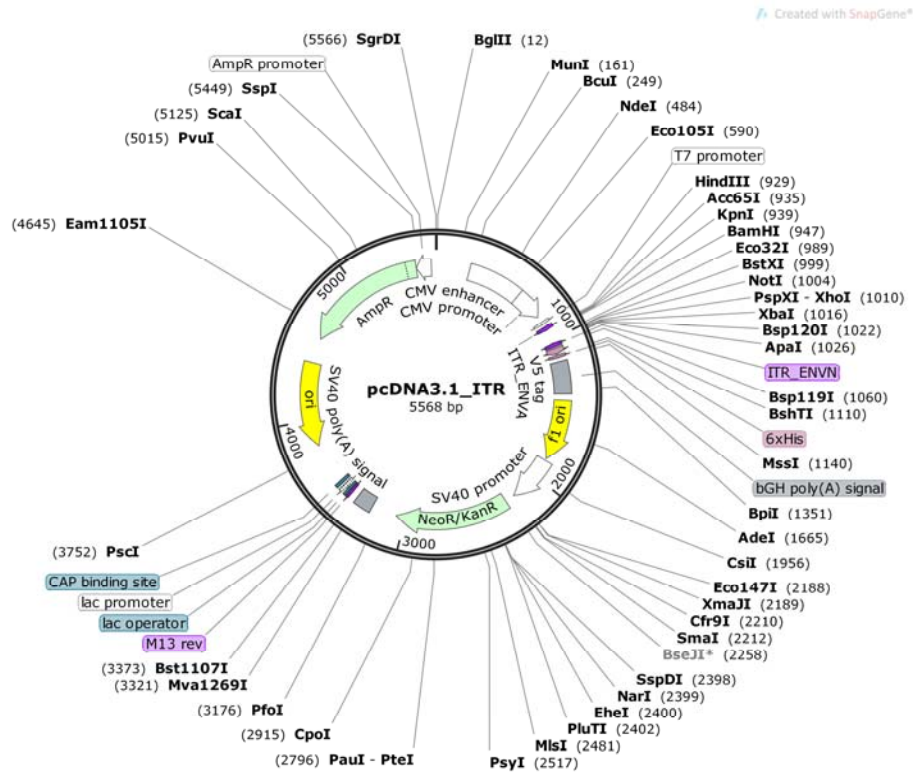

516

517 **Supplementary Figure 2 – Vector map of modified pcDNA3.1 plasmid utilized for cloning HIV-1**  
518 **env/rev cassettes.** In pcDNA3.1 (+) backbone, ENVA (Fw2) and ENVN (Rv2) sites optimized based  
519 on results of figure 1 were integrated (ITR\_ENVA and ITR\_ENVN) into pcDNA3.1 by performing two  
520 rounds of overlap extension PCR upstream to HindIII and downstream to ApaI restriction sites.
